# Supplementary material for: A high-performance electrocatalyst via graphitic carbon nitride nanosheet-decorated bimetallic phosphide for alkaline water electrolysis
Source: Royal Society of Chemistry journal article supplement (doi:10.1039/d4cp00020j), 2024-01-01
Supplement: d4cp00020j1.pdf [file d4cp00020j1.pdf]

## Supporting information

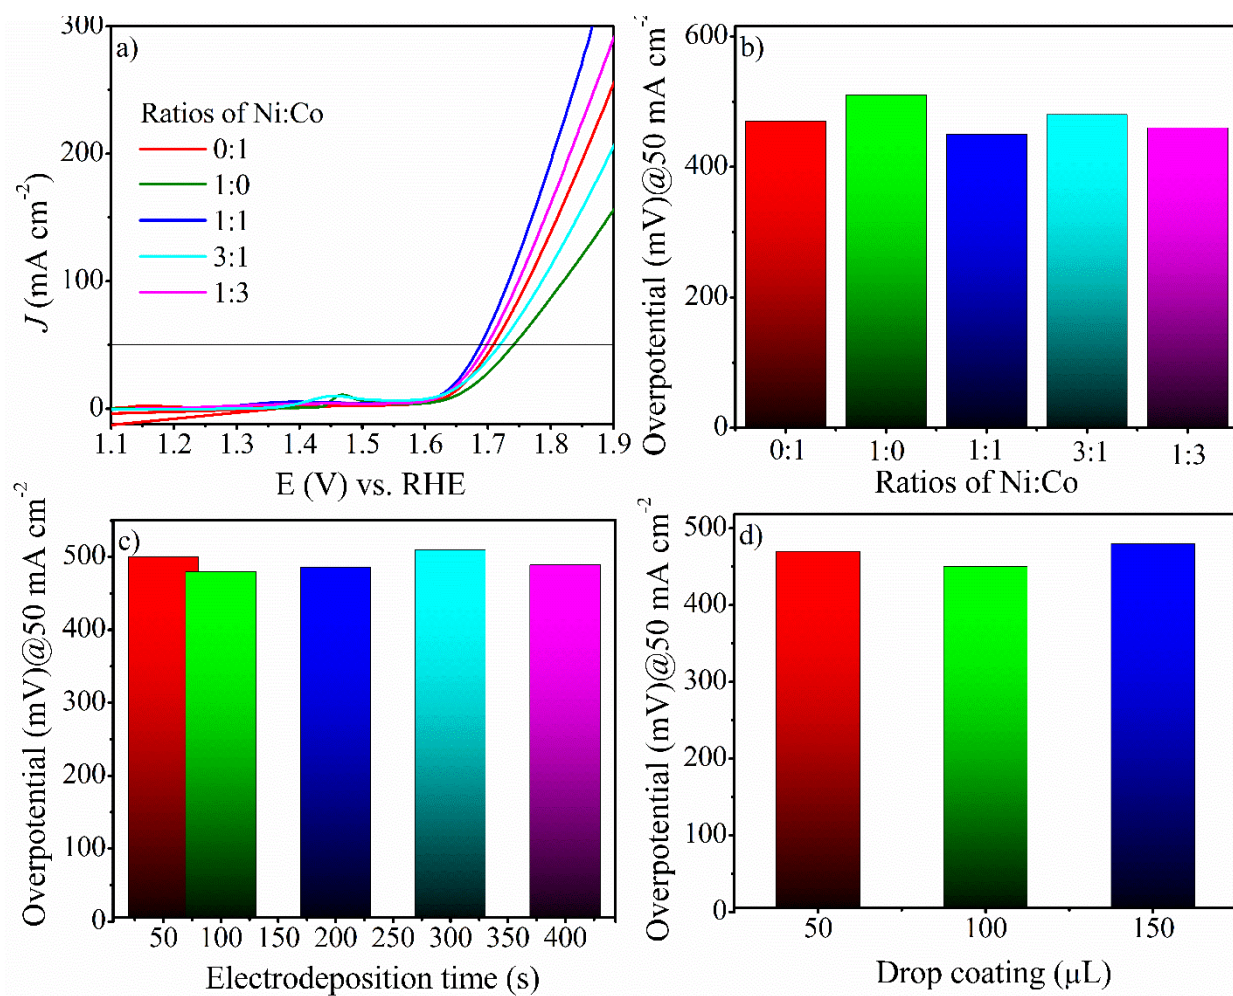

**Fig.S1.** (a) OER LSVs of NiCoP/NF catalysts in different ratio of Ni:Co in 1 M KOH electrolyte at scan rate of 2 mV s<sup>-1</sup>. (b) The bar graph of overpotential at 50 mA cm<sup>-2</sup> of different ratio of Ni:Co. (c) Electrodeposition time of NiCoP on NF. (d) The bar graph of thickness of g-C<sub>3</sub>N<sub>4</sub> on NF.

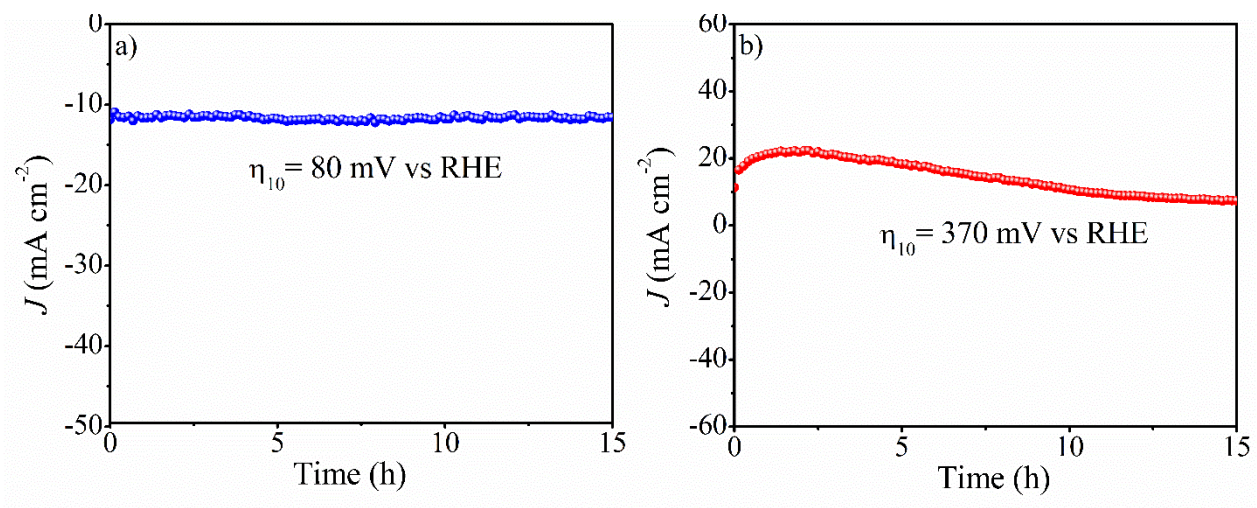

**Fig.S2.** Chronoamperograms of g-C<sub>3</sub>N<sub>4</sub>/NiCoP/NF in 1 M KOH for (a) HER at 80 mV versus RHE, (b) OER at 370 mV vs. RHE.

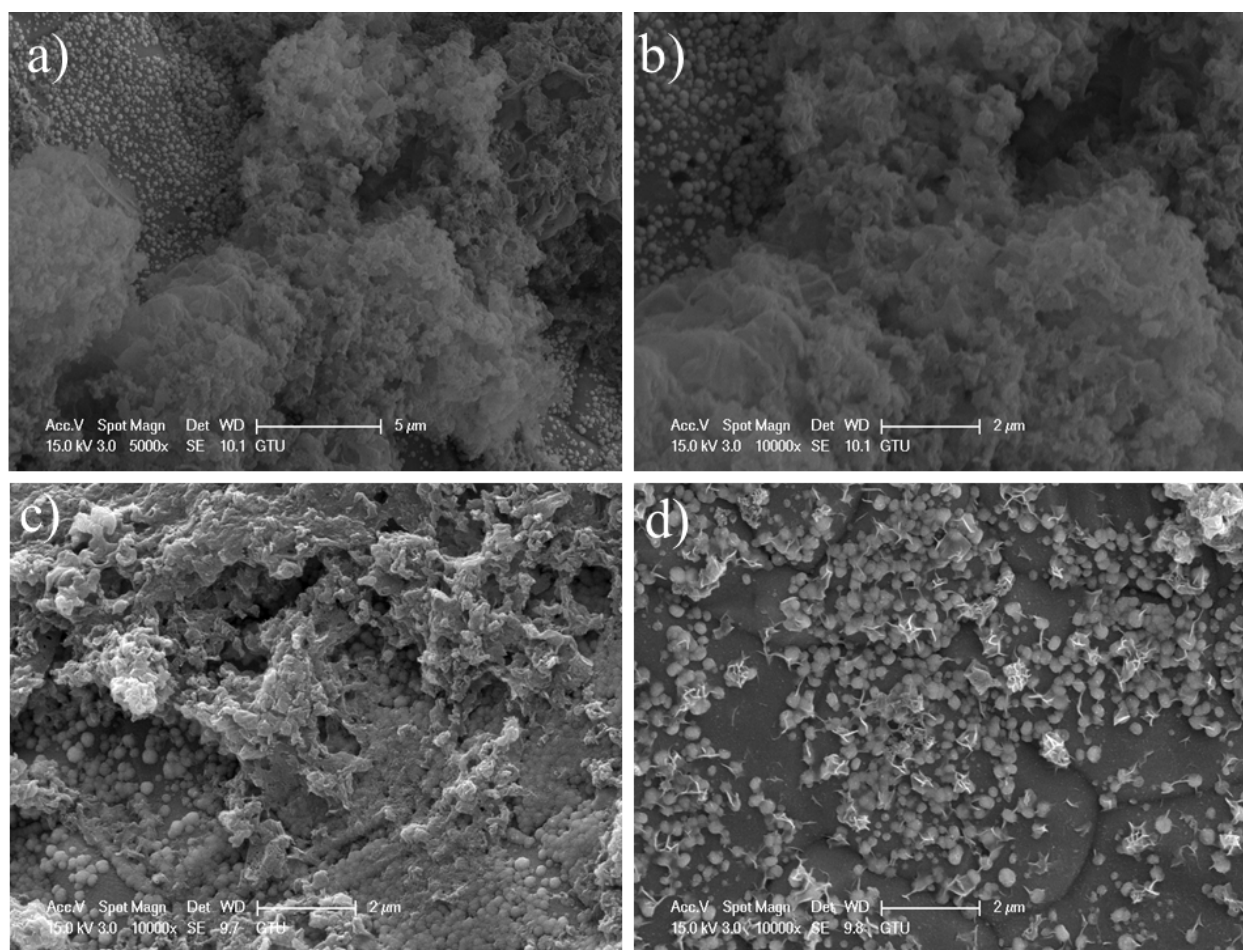

**Fig.S3.** (a-b) Low- and high-resolution SEM images of g-C<sub>3</sub>N<sub>4</sub>/NiCoP/NF, (c) Post-HER, (d) Post-OER.

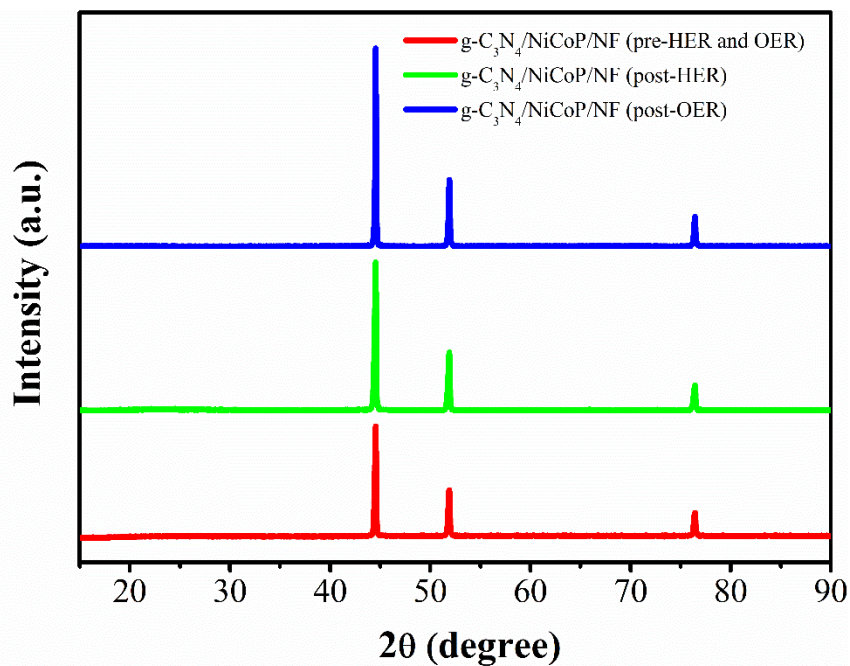

**Fig.S4.** XRD analysis of g-C<sub>3</sub>N<sub>4</sub>/NiCoP/NF for Pre-HER and OER, Post-HER and Post-OER.

**Table S1.** A comparison of electrochemical performances of electrocatalyst containing NiCoP in alkaline electrolyte.

|                                               | $\eta_{10}$ (mV) vs. RHE<br>for HER | Tafel slope<br>(mV dec <sup>-1</sup> ) | $\eta_{10}$ (mV) vs. RHE<br>for OER | Tafel slope<br>(mV dec <sup>-1</sup> ) | Cell Voltage (V)<br>for OWS | Ref.         |
|-----------------------------------------------|-------------------------------------|----------------------------------------|-------------------------------------|----------------------------------------|-----------------------------|--------------|
| <b>NiCoP/NF</b>                               | 60                                  | 51.4                                   | 253                                 | 49.5                                   | 1.55                        | [1]          |
| <b>Ni<sub>0.83</sub>Co<sub>0.17</sub>P/NF</b> | -                                   | -                                      | 295                                 | 45                                     | -                           | [2]          |
| <b>NiCoP@NC-NCNTs</b>                         | -                                   | -                                      | 227                                 | 99                                     | -                           | [3]          |
| <b>Ni<sub>0.51</sub>Co<sub>0.49</sub>P/NF</b> | 82                                  | 43                                     | 239                                 | 45                                     | 1.57                        | [4]          |
| <b>Ni-Co-P/NF</b>                             | 85                                  | 46                                     | -                                   | -                                      | -                           | [5]          |
| <b>NiCoP NWAs/NF</b>                          | 104                                 | 54                                     | ~270@ $\eta_{20}$                   | 116                                    | 1.64                        | [6]          |
| <b>NiCoP@NF-100</b>                           | 98                                  | 68                                     | -                                   | -                                      | 1.8                         | [7]          |
| <b>NiCoP</b>                                  | 43                                  | 77.8                                   | 238                                 | 96                                     | 1.52                        | [8]          |
| <b>Ti<sub>3</sub>C<sub>2</sub>@mNiCoP</b>     | 127                                 | 103                                    | 237                                 | 104                                    | 1.57                        | [9]          |
| <b>NiCoP NR@NS</b>                            | 71                                  | 57                                     | 268                                 | 71                                     | 1.57                        | [10]         |
| <b>NiCoP<br/>nanopeapods/CNTs</b>             | 82                                  | 63                                     | 250                                 | 67                                     | 1.558                       | [11]         |
| <b>NiCoP@PNCNF</b>                            | 98                                  | 58                                     | 260                                 | 63                                     | 1.645                       | [12]         |
| <b>g-C<sub>3</sub>N<sub>4</sub>/NiCoP/NF</b>  | 80                                  | 89                                     | 370                                 | 64                                     | 1.70                        | This<br>work |

**Table S2.** The XPS fitting results of NiCoP/NF and g-C<sub>3</sub>N<sub>4</sub>/NiCoP/NF.

|             |                                           | <b>Peak</b>         | <b>Area</b> | <b>BE(eV)</b> | <b>Height</b> | <b>FWHM(eV)</b> |
|-------------|-------------------------------------------|---------------------|-------------|---------------|---------------|-----------------|
| <b>C1s</b>  | NiCoP/NF                                  | sp <sup>2</sup> C   | 3880.34     | 284.90        | 1539.12       | 2.37            |
|             | g-C <sub>3</sub> N <sub>4</sub> /NiCoP/NF | sp <sup>2</sup> C   | 5023.28     | 284.91        | 2261.12       | 2.09            |
|             |                                           |                     |             | 2128.31       | 287.39        | 773.70          |
| <b>O1s</b>  | NiCoP/NF                                  | P-O                 | 11517.91    | 531.44        | 4632.49       | 2.34            |
|             | g-C <sub>3</sub> N <sub>4</sub> /NiCoP/NF | P-O                 | 15134.97    | 531.77        | 5555.35       | 2.56            |
| <b>Ni2p</b> | NiCoP/NF                                  | Ni2p <sub>3/2</sub> | 3078.76     | 856.28        | 1042.40       | 2.77            |
|             |                                           | Sat.                | 2810.87     | 861.39        | 484.99        | 5.44            |
|             |                                           | Ni2p <sub>1/2</sub> | 1364.68     | 874.03        | 430.39        | 2.98            |
|             |                                           | Sat.                | 2867.68     | 879.33        | 358.97        | 7.50            |
|             | g-C <sub>3</sub> N <sub>4</sub> /NiCoP/NF | Ni2p <sub>3/2</sub> | 3750.61     | 856.40        | 1261.06       | 2.79            |
|             |                                           | Sat.                | 2412.28     | 861.34        | 471.12        | 4.81            |
|             |                                           | Ni2p <sub>1/2</sub> | 2160.95     | 874.20        | 591.48        | 3.43            |
|             |                                           | Sat.                | 1982.81     | 879.97        | 365.04        | 5.10            |
| <b>Co2p</b> | NiCoP/NF                                  |                     | 1688.24     | 775.54        | 217.70        | 7.29            |
|             |                                           | Co2p <sub>3/2</sub> | 1935.98     | 781.35        | 624.42        | 2.91            |
|             |                                           | Sat.                | 2960.36     | 784.76        | 421.12        | 6.60            |
|             |                                           | Co2p <sub>1/2</sub> | 1050.21     | 797.31        | 324.23        | 3.04            |
|             | g-C <sub>3</sub> N <sub>4</sub> /NiCoP/NF | Sat.                | 1327.52     | 802.48        | 198.38        | 6.29            |
|             |                                           |                     | 4182.17     | 776.19        | 355.70        | 11.05           |
|             |                                           | Co2p <sub>3/2</sub> | 3453.05     | 781.65        | 1004.56       | 3.23            |
|             |                                           | Sat.                | 2527.72     | 785.66        | 460.09        | 5.16            |
| <b>P2p</b>  | NiCoP/NF                                  | Co2p <sub>1/2</sub> | 1257.87     | 797.55        | 438.32        | 2.70            |
|             |                                           | Sat.                | 1839.66     | 802.49        | 263.98        | 6.55            |
|             | g-C <sub>3</sub> N <sub>4</sub> /NiCoP/NF | P-O                 | 2193.99     | 133.33        | 887.43        | 2.32            |
|             |                                           | P-O                 | 1681.08     | 133.15        | 733.56        | 2.15            |

**Table S3.** The estimated EIS parameters of the catalysts.

|            | <b>Catalysts</b>                       | <b>R<sub>s</sub> (Ω)</b> | <b>R<sub>ct</sub>(kΩ)</b> | <b>CPE(S.s<sup>a</sup>)</b> |
|------------|----------------------------------------|--------------------------|---------------------------|-----------------------------|
|            | g-C <sub>3</sub> N <sub>4</sub>        | 2.09                     | 7.29                      | 428.4x10 <sup>-6</sup>      |
| <b>HER</b> | NiCoP                                  | 2.20                     | 5.16                      | 347.4x10 <sup>-6</sup>      |
|            | g-C <sub>3</sub> N <sub>4</sub> /NiCoP | 2.20                     | 4.84                      | 305.3x10 <sup>-6</sup>      |
|            | g-C <sub>3</sub> N <sub>4</sub>        | 1.79                     | 0.27                      | 690.7x10 <sup>-3</sup>      |
| <b>OER</b> | NiCoP                                  | 2.10                     | 14.53                     | 949.7x10 <sup>-6</sup>      |
|            | g-C <sub>3</sub> N <sub>4</sub> /NiCoP | 1.81                     | 0.11                      | 35.47x10 <sup>-3</sup>      |

**Table S4.** The calculated TOF parameters of the catalysts.

|                            | <b>Catalysts</b>                       | <b>I (mA)</b> | <b>Q (mC)</b> | <b>Γ</b>               | <b>TOF (s<sup>-1</sup>)</b> |
|----------------------------|----------------------------------------|---------------|---------------|------------------------|-----------------------------|
| <b>HER</b><br>η= -0.050 mV | g-C <sub>3</sub> N <sub>4</sub>        | -7.72         | -141.9        | -8.86x10 <sup>17</sup> | 0.027                       |
|                            | NiCoP                                  | -6.42         | -118.8        | -7.42x10 <sup>17</sup> | 0.027                       |
|                            | g-C <sub>3</sub> N <sub>4</sub> /NiCoP | -9.11         | -157.4        | -9.82x10 <sup>17</sup> | 0.029                       |
| <b>OER</b><br>η=0.410 mV   | g-C <sub>3</sub> N <sub>4</sub>        | 2.36          | 27.41         | 1.71x10 <sup>17</sup>  | 0.022                       |
|                            | NiCoP                                  | 7.16          | 86.72         | 5.41x10 <sup>17</sup>  | 0.021                       |
|                            | g-C <sub>3</sub> N <sub>4</sub> /NiCoP | 2.54          | 28.82         | 1.80x10 <sup>17</sup>  | 0.047                       |



## References

- [1] H.-S. Hu, Y. Li, Y.-R. Shao, K.-X. Li, G. Deng, C.-B. Wang, Y.-Y. Feng, NiCoP nanorod arrays as high-performance bifunctional electrocatalyst for overall water splitting at high current densities, *J Power Sources*, 484 (2021) 229269.
- [2] S. Battiato, L. Bruno, A.L. Pellegrino, A. Terrasi, S. Mirabella, × Optimized electroless deposition of NiCoP electrocatalysts for enhanced water splitting, *Catalysis Today*, (2022).
- [3] R. Li, C. Liu, P. Tang, B. Yang, X. Li, G. Yang, L. Xie, NiCoP nanowire arrays embedded in 3D integrated N-doped carbon network for enhanced electrochemical oxygen evolution, *Vacuum*, 192 (2021) 110395.
- [4] J. Yu, Q. Li, Y. Li, C.Y. Xu, L. Zhen, V.P. Dravid, J. Wu, Ternary metal phosphide with triple-layered structure as a low-cost and efficient electrocatalyst for bifunctional water splitting, *Adv Funct Mater*, 26 (2016) 7644-7651.
- [5] C. Yu, F. Xu, L. Luo, H.S. Abbo, S.J. Titinchi, P.K. Shen, P. Tsiakaras, S. Yin, Bimetallic Ni–Co phosphide nanosheets self-supported on nickel foam as high-performance electrocatalyst for hydrogen evolution reaction, *Electrochimica Acta*, 317 (2019) 191-198.
- [6] J. Li, G. Wei, Y. Zhu, Y. Xi, X. Pan, Y. Ji, I.V. Zatonvsky, W. Han, Hierarchical NiCoP nanocone arrays supported on Ni foam as an efficient and stable bifunctional electrocatalyst for overall water splitting, *J Mater Chem A*, 5 (2017) 14828-14837.
- [7] L. Chen, Y. Song, Y. Liu, L. Xu, J. Qin, Y. Lei, Y. Tang, NiCoP nanoleaves array for electrocatalytic alkaline H<sub>2</sub> evolution and overall water splitting, *Journal of Energy Chemistry*, 50 (2020) 395-401.
- [8] W. Zou, C. Sun, K. Zhao, J. Li, X. Pan, D. Ye, Y. Xie, W. Xu, H. Zhao, L. Zhang, Surface reconstruction of NiCoP pre-catalysts for bifunctional water splitting in alkaline electrolyte, *Electrochimica Acta*, 345 (2020) 136114.
- [9] Q. Yue, J. Sun, S. Chen, Y. Zhou, H. Li, Y. Chen, R. Zhang, G. Wei, Y. Kang, Hierarchical mesoporous MXene–NiCoP electrocatalyst for water-splitting, *ACS applied materials interfaces*, 12 (2020) 18570-18577.
- [10] J.-G. Wang, W. Hua, M. Li, H. Liu, M. Shao, B. Wei, Structurally engineered hyperbranched NiCoP arrays with superior electrocatalytic activities toward highly efficient overall water splitting, *ACS applied materials interfaces*, 10 (2018) 41237-41245.
- [11] J. Bian, Z. Song, Y. Zhang, C. Cheng, NiCoP nanopeapods embedded in carbon nanotube arrays as bifunctional catalysts for efficient overall water splitting, *Materials Today Nano*, 8 (2019) 100053.
- [12] X. Sun, P. Wei, J. Zhang, S. Gu, R. Yang, C. Fang, Q. Li, J. Han, Z. Jiang, J. He, P, N-codoped carbon nanofibers confined ultra-small bimetallic NiCoP for highly efficient overall water splitting, *Applied Surface Science*, 570 (2021) 151247.
